# Supplementary material
Source: publisher figshare collection journal article supplement (https://acs.figshare.com/ndownloader/files/4073503)
Supplement: Supplementary file 1 [file 4073503]

# Supporting Information: C-H Stretch for Probing Kinetics of Self-Assembly into Macromolecular Chiral Structures at Interfaces by Chiral Sum Frequency Generation Spectroscopy

*Zhuguang Wang, Li Fu, Elsa C. Y. Yan\**

Department of Chemistry, Yale University, 225 Prospect Street, New Haven, Connecticut 06520,  
United States

## **(I) The SFG setup and experiments**

The broad-bandwidth SFG spectrometer used in the study was described in detail in *Ma et al.*<sup>1</sup> It contains a 6-W regenerative amplifier seeded by a 120-fs 1.9-W Ti:sapphire oscillator (Mai Tai, Spectra-Physics) and is pumped by two Nd:YLF pump lasers (16 W, Empower, Spectra-Physics). One half of the amplifier output (3 W) pumped an OPA (TOPAS, Spectra-Physics) to generate a 120-fs pulsed IR beam in the range of 3800–900  $\text{cm}^{-1}$ . The other half (3W) of the amplifier 800-nm output entered a pulse shaper to yield  $\sim 2$  ps pulses to a narrow bandwidth of  $\sim 7$   $\text{cm}^{-1}$ . The pulse shaper consisted of a grating, a planoconvex cylindrical lens, and a homemade slit. The reflected SFG signal was filtered, focused onto the slit of the monochromator (SP-2558, Princeton Instruments), and detected by a CCD (Spec-10:400BR/LN, Princeton Instruments). The 800 nm beam has an incident angle of  $56^\circ$  and the IR beam has an incident angle of  $69^\circ$ . The spot size of

the 800-nm beam is  $\sim 60\ \mu\text{m}$  and that of the IR beam is  $\sim 70\ \mu\text{m}$  in diameter. To prevent heating effects from laser irradiation, as is discussed by Backus *et al.*,<sup>2</sup> we use a spectrometer with a relatively long pulse duration (120 fs) and high repetition rate (5 kHz), and thus relatively low IR pulse energy and power ( $\sim 4\ \mu\text{J}$ , 20 mW, C-H). Besides, the IR and visible beams are focused slightly below the interface. To maintain the constancy of the surface level when acquiring the SFG spectra, we used a reference point provided by the reflection of the 800-nm visible beam. After addition of the HCl or NaOH solution, we adjusted the height of the sample stage to bring the reflection of the 800-nm beam to the same reference point, which allowed us to ensure that the surface level is constant.

To determine the IR profile, we used the method specified in Ma *et al.*<sup>1</sup> Briefly, we placed a nonlinear GaAs crystal on the sample stage and took a nonresonant SFG spectrum from the surface of GaAs. The spectrum of GaAs provided the energy profile of the IR beam, which was used to normalize the SFG spectra.

## (II) Supplementary Data

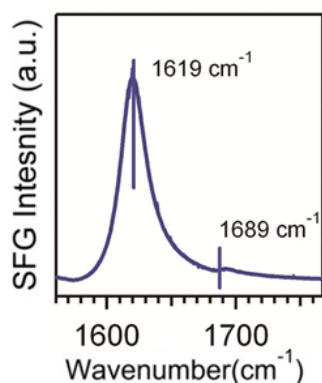

Figure S1. cSFG spectrum in the amide I region of LK<sub>7</sub>β at the air-water interface at pH  $\sim 7.4$ .

Table S1. Peak assignments and fitting parameters of the spectra of the initial (Figure 1B) and Refolded (Figure 1C) states of LK<sub>7</sub>β.

| Assignments               | Parameters                     | Initial         | Refolded        |
|---------------------------|--------------------------------|-----------------|-----------------|
| Nonresonance              | $\chi_{NR}^{(2)}$              | 0.00047±0.00572 | 0.00084±0.00298 |
| CH <sub>2</sub> SS        | $A_I$ (a.u.)                   | 0.79±2.07       | 0.90±0.63       |
|                           | $\omega_I$ (cm <sup>-1</sup> ) | 2854.5±13.8     | 2851.1±2.5      |
|                           | $\Gamma_I$ (a.u.)              | 19.3±18.0       | 19.5±4.7        |
| CH <sub>3</sub> SS        | $A_2$ (a.u.)                   | 0.82±1.98       | 0.80±0.96       |
|                           | $\omega_2$ (cm <sup>-1</sup> ) | 2872.3±8.6      | 2868.0±0.0      |
|                           | $\Gamma_2$ (a.u.)              | 17.2±16.0       | 22.8±14.9       |
| CH <sub>2</sub> FR        | $A_3$ (a.u.)                   | 0.39±0.96       | 0.27±0.37       |
|                           | $\omega_3$ (cm <sup>-1</sup> ) | 2900.7±5.7      | 2893.0±0.0      |
|                           | $\Gamma_3$ (a.u.)              | 9.6±9.5         | 10.1±6.9        |
| CH <sub>2</sub> AS        | $A_4$ (a.u.)                   | 0.30±1.04       | 0.70±0.19       |
|                           | $\omega_4$ (cm <sup>-1</sup> ) | 2911.1±5.9      | 2909.0±0.0      |
|                           | $\Gamma_4$ (a.u.)              | 9.2±13.2        | 10.3±1.8        |
| CH <sub>3</sub> FR        | $A_5$ (a.u.)                   | -1.20±0.07      | -0.63±0.05      |
|                           | $\omega_5$ (cm <sup>-1</sup> ) | 2932.6±0.5      | 2934.5±0.7      |
|                           | $\Gamma_5$ (a.u.)              | 6.8±0.5         | 5.1±0.6         |
| CH <sub>3</sub> AS        | $A_6$ (a.u.)                   | 1.89±0.03       | 1.42±0.04       |
|                           | $\omega_6$ (cm <sup>-1</sup> ) | 2958.1±0.2      | 2959.0±0.2      |
|                           | $\Gamma_6$ (a.u.)              | 7.5±0.1         | 7.0±0.1         |
| C <sub>α</sub> -H Stretch | $A_7$ (a.u.)                   | 0.79±0.07       | 0.93±0.07       |
|                           | $\omega_7$ (cm <sup>-1</sup> ) | 2988.0±0.0      | 2984.3±0.3      |
|                           | $\Gamma_7$ (a.u.)              | 9.6±0.8         | 10.4±0.6        |

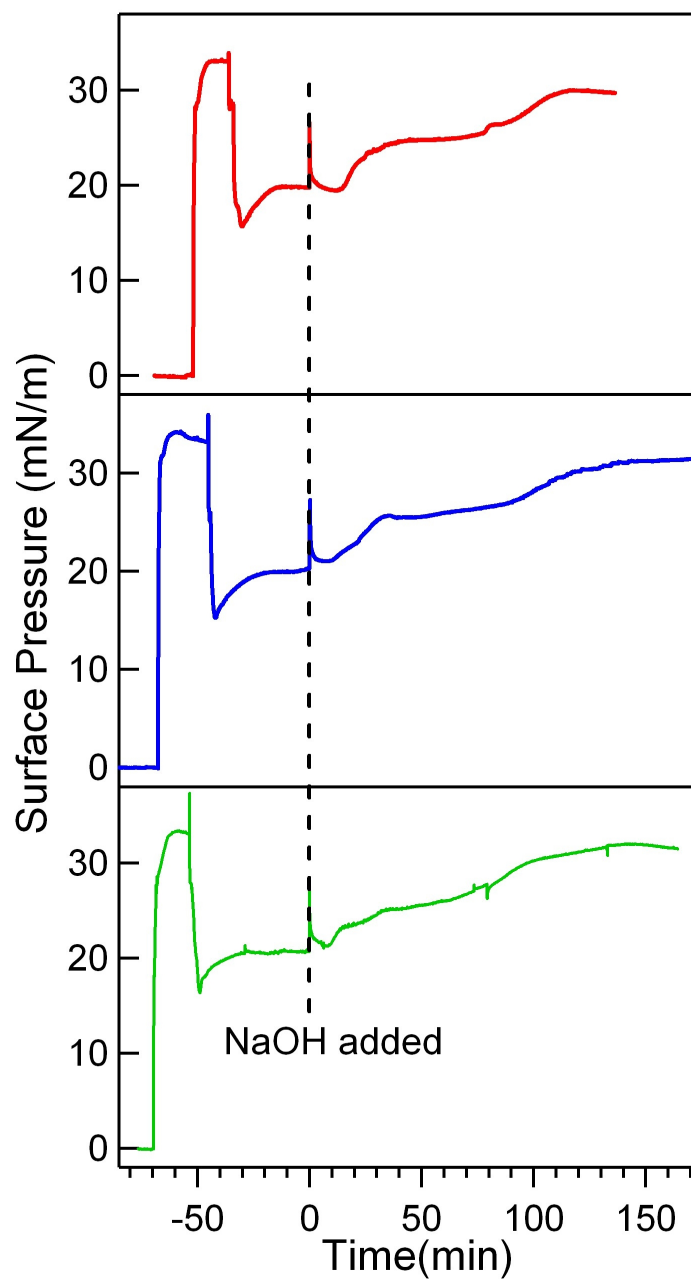

Figure S2. Three independent experiments of surface pressure measurements: the dashed line indicates addition of NaOH at  $t = 0$ , i.e., the beginning of the refolding process.

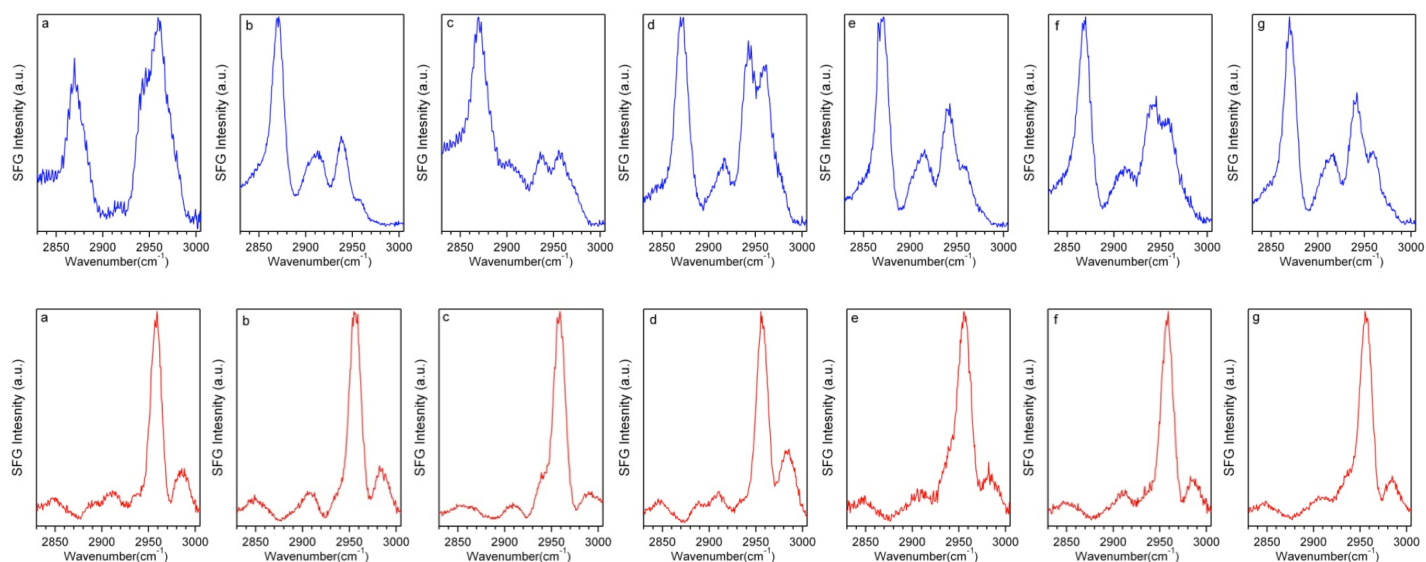

Figure S3. The achiral (ssp, blue) versus chiral (psp, red) SFG spectra for the folded state of LK<sub>7</sub>β.

The notations (a) to (g) represent various positions at the air-water interface; the same letter in the achiral and chiral spectra represents the same position. Data in (a) to (c) are presented in the main text.

## References

1. Ma, G.; Liu, J.; Fu, L.; Yan, E. C. Y., Probing Water and Biomolecules at the Air-Water Interface with a Broad Bandwidth Vibrational Sum Frequency Generation Spectrometer from 3800 to 900 cm<sup>-1</sup>. *Applied Spectroscopy* **2009**, *63* (5), 528-537.
2. Backus, E. H. G.; Bonn, D.; Cantin, S.; Roke, S.; Bonn, M., Laser-Heating-Induced Displacement of Surfactants on the Water Surface. *J Phys Chem B* **2012**, *116* (9), 2703-2712.
